# Supplementary material for: Plasma-enhanced microwave solid-state synthesis of cadmium sulfide: reaction mechanism and optical properties
Source: Royal Society of Chemistry journal article supplement (doi:10.1039/c5dt01858g), 2015-01-01
Supplement: c5dt01858g1.pdf [file c5dt01858g1.pdf]

1 Supporting Information

2

3

## 4 **Plasma-enhanced Microwave Solid-state Synthesis of Cadmium** 5 **Sulfide: Reaction Mechanism and Optical Properties**

6 **Ke-zhao Du,<sup>a, b</sup> Apoorva Chaturvedi,<sup>a</sup> Xing-zhi Wang,<sup>b</sup> Yi Zhao,<sup>a</sup> Ke-ke Zhang,<sup>a</sup>**  
7 **Muhammad Iqbal Bakti Utama,<sup>b</sup> Peng Hu,<sup>a</sup> Hui Jiang,<sup>a</sup> Qi-hua Xiong,<sup>b</sup> Christian Kloc<sup>a\*</sup>**

8

9 <sup>a</sup> Division of Materials Science & Engineering, Nanyang Technological University, 637371,  
10 Singapore.

11 <sup>b</sup> Division of Physics and Applied Physics, School of Physical and Mathematical Sciences,  
12 Nanyang Technological University, 637371, Singapore.

13

14 **Chemical:** The Cadmium powder (-200 mesh, 99.99%), sulfur pieces (Puratronic, 99.9995%),  
15 selenium powder (200 -mesh, 99.999%), tellurium powder (200 -mesh, 99.5%), zinc flake (-325  
16 mesh, 99.9%) and iodine spheres (ultra dry, 10 -mesh, 99.998%) were all purchased from the  
17 Alfa Aesar company. All elements were purchased in form of powders delivered and stored in  
18 glass bottles. Therefore, powders could be slightly surface oxidized. The content of oxygen in  
19 the powders, used for reactions, is not defined by vendors and was not analyzed by us. However,  
20 we detected some traces of CdO and Cd(OH)<sub>2</sub> in powder diffraction spectra.

21 **PMPVT experiments:** All of the reagents were used without further purification. Fine powders  
22 of respective metals and chalcogens were mixed and sealed in a quartz ampoule (approximately  
23 100~200 mg of mixture). The length of the quartz ampoule is about 8~9 cm with the 13 mm  
24 external diameter. The ampoule was filled with Ar gas and the pressure inside could be  
25 controlled from  $1 \times 10^{-4}$  Torr to 750 Torr. The optimized pressure is 10 Torr. Then, the ampoules  
26 were placed in a quartz tube that was located in the center of a modified domestic microwave  
27 oven (2450 MHz, 1 kW) without any additional conventional heating. The argon gas with about  
28 5 ~ 10 Torr pressure flowed through the evacuated quartz tube. When the microwave oven was

29 running, the argon plasma in the quartz tube was ignited and could be seen. After 2~4 hours,  
30 most of the reactions were complete.

31 **PMCVT experiment:** The PMCVT experiment was very similar with PMPVT. The only  
32 different was that the iodine (about 8 mg) was added as transport chemical in the starting mixture.  
33 The Cd:S:I ratio is about 16: 1. We kept the PMCVT for 4 hours to get the fully reacted product.

34 **Physical measurement:** PXRD patterns were collected by a Bruker D8 Advance diffractometer  
35 using  $\text{CuK}\alpha$  (1.54178 Å) radiation in the angular range of  $2\theta = 5-75^\circ$  at room temperature. SEM  
36 images and EDX were obtained from a JEOL JSM 7600F scanning electron microscope. Both  
37 the laser beams (solid-state laser, 473 nm and Nd:YAG solid-state laser, 532 nm) were  
38 collimated and focused thorough a 100× objective onto the sample surface. All of the spectra  
39 were collected using a confocal triple-grating spectrometer (Horiba-JY T64000). The reflectance  
40 was collected by CRAIC 20 Microspectrophotometer and converted to absorbance using the  
41 Kubelka - Munk equation.<sup>1</sup> The PL spectrum was fitted by a Gaussian function in Origin  
42 software, whereas the baseline-subtracted Raman peaks were fitted by a Lorentzian function. The  
43 Raman baseline was fitted by a line function. The simulated PXRD pattern through single crystal  
44 data was generated by Mercury 2.3 software.

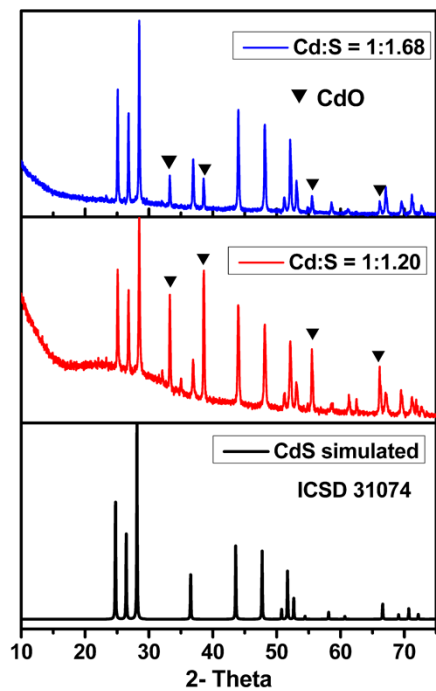

45

46 **Fig. S1.** XRD of the products with different ratio of Cd:S in 2h reaction.

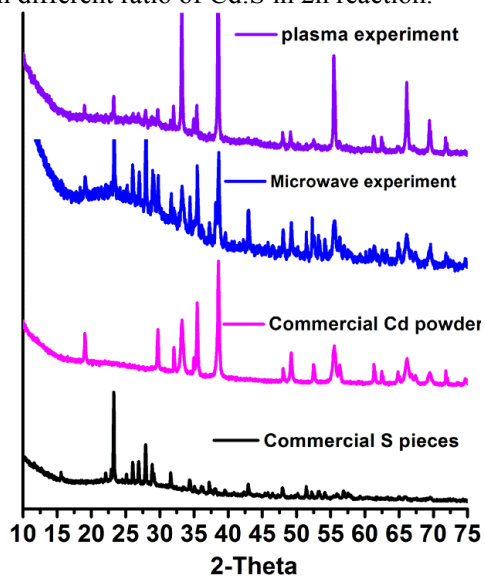

47

48 **Fig. S2.** The XRD of the products under different conditions.

49

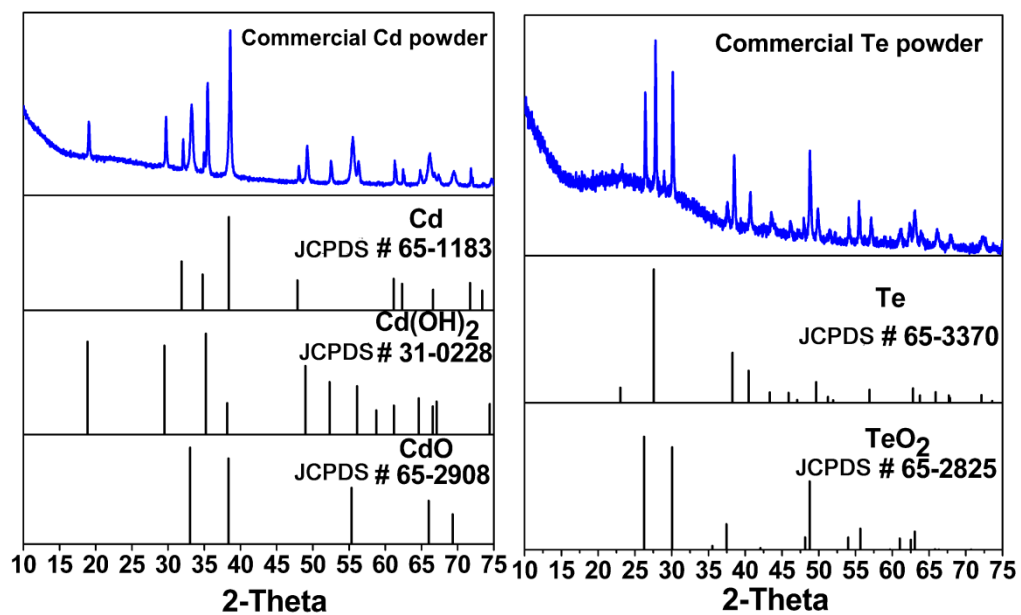

50

51 **Fig. S3.** The PXRD of commercial Cd and Te powder.

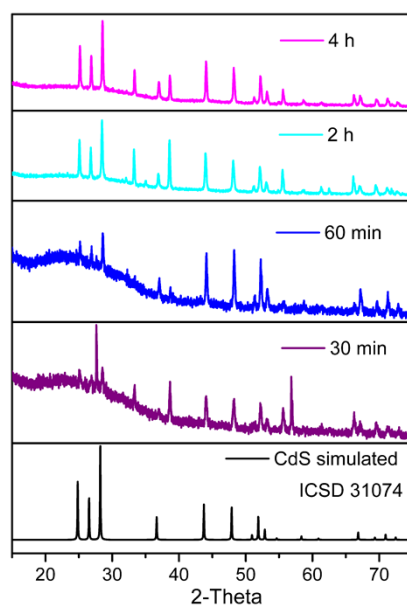

52

53

54 **Fig. S4.** The effect of reaction time.

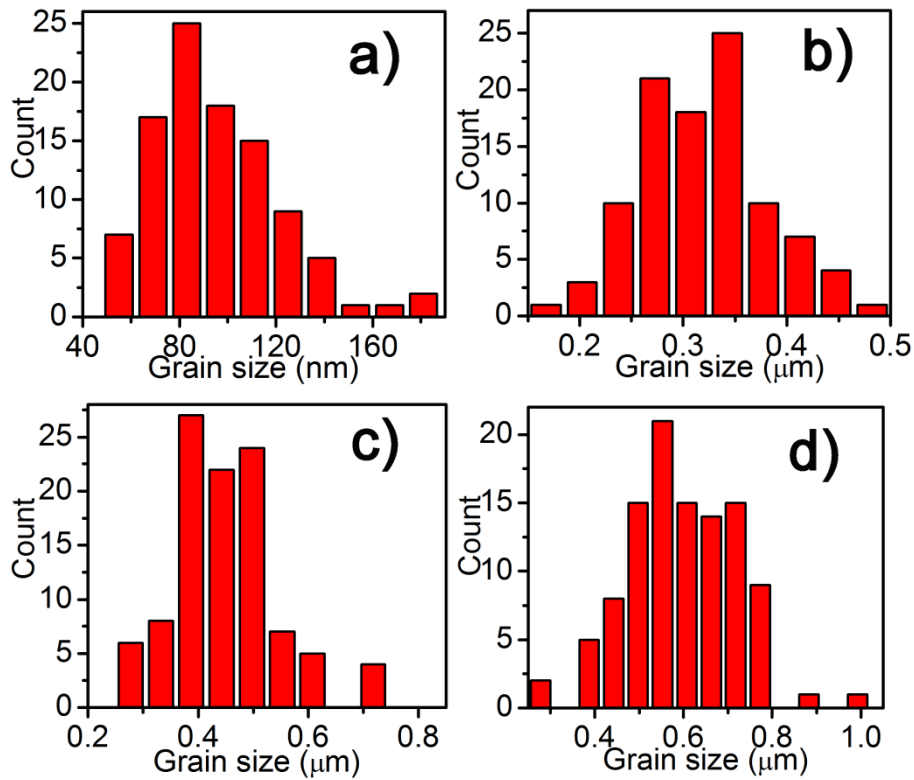

58 **Fig. S5.** Time dependent grain size distribution of CdS synthesized by PMPVT, a) 30 min; b) 60 min; c) 120  
 59 min and d) 240 min.

60  
 61 **Table S1** SEM images, EDX and PXRD patterns of other II-VI chalcogenides synthesized by PMPVT. The  
 62 blue curve in the XRD results is the experimental pattern, whereas the black one is the related theoretical one.

|         | SEM     | EDX                                                                                                                                                                                                                                                                                                                                              | PXRD    |         |         |      |       |       |      |       |       |        |        |  |                                                                                             |
|---------|---------|--------------------------------------------------------------------------------------------------------------------------------------------------------------------------------------------------------------------------------------------------------------------------------------------------------------------------------------------------|---------|---------|---------|------|-------|-------|------|-------|-------|--------|--------|--|---------------------------------------------------------------------------------------------|
| CdSe    |         | <table border="1"> <thead> <tr> <th>Element</th> <th>Weight%</th> <th>Atomic%</th> </tr> </thead> <tbody> <tr> <td>Se L</td> <td>38.54</td> <td>47.16</td> </tr> <tr> <td>Cd L</td> <td>61.46</td> <td>52.84</td> </tr> <tr> <td>Totals</td> <td>100.00</td> <td></td> </tr> </tbody> </table> <p>Full Scale 2111 cts Cursor: 6.444 (38 cts)</p> | Element | Weight% | Atomic% | Se L | 38.54 | 47.16 | Cd L | 61.46 | 52.84 | Totals | 100.00 |  | <p>— CdSe Synthesized<br/>       — CdSe Calculated<br/>       ICSD 60630</p> <p>2-Theta</p> |
| Element | Weight% | Atomic%                                                                                                                                                                                                                                                                                                                                          |         |         |         |      |       |       |      |       |       |        |        |  |                                                                                             |
| Se L    | 38.54   | 47.16                                                                                                                                                                                                                                                                                                                                            |         |         |         |      |       |       |      |       |       |        |        |  |                                                                                             |
| Cd L    | 61.46   | 52.84                                                                                                                                                                                                                                                                                                                                            |         |         |         |      |       |       |      |       |       |        |        |  |                                                                                             |
| Totals  | 100.00  |                                                                                                                                                                                                                                                                                                                                                  |         |         |         |      |       |       |      |       |       |        |        |  |                                                                                             |

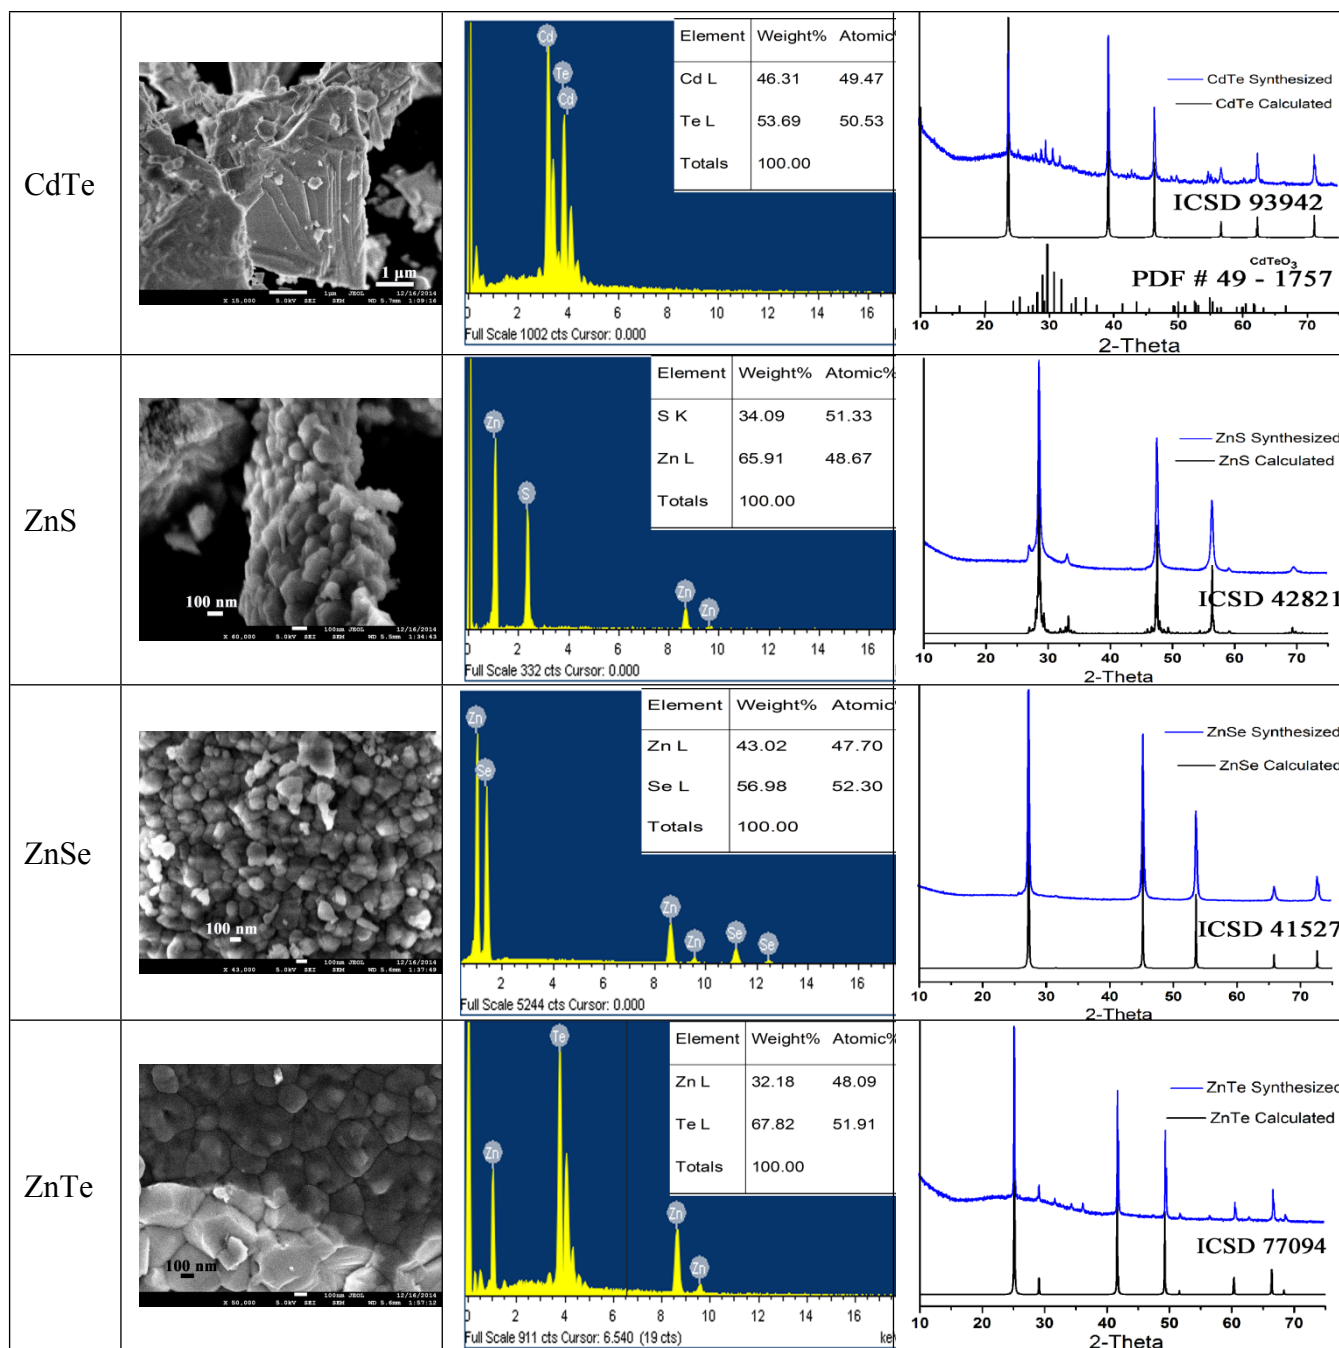

63

64 1. Nobbs, J. H., Kubelka—Munk Theory and the Prediction of Reflectance. *Color. Technol.*

65 **1985**, 15 (1), 66-75.

66

67
